# Supplementary material for: Hindering the illegal trade in dog and cat furs through a DNA-based protocol for species identification
Source: PubMed Central journal article supplement (PMC5993017; doi:10.7717/peerj.4902), 2018-06-05
Supplement: peerj-06-4902-s001.pdf [file peerj-06-4902-s001.pdf]

Raw data S1. Sequences of our reference specimens for ND1 and cytb markers. Sequences were not submitted to GenBank because they are shorter than the minimum length requested for submission (200 base pairs). Due to lack of intraspecific variability of the analysed sequences, one sequence per species is shown.

**ND1 reference sequences:**

*Canis lupus*\_ND1

TCCTAATAAACGGGTCATTTACACTATCCACGCTAATTATTACCCAAGAACATATATGA  
TTAATCTTTCCGGCCTGACCCCTAGCCATGATATGATTCATCTCTACCCTAGCAGAAAC  
TAATCGAGCCCCCTTCGACTTA

*Canis latrans*\_ND1

TTCTAATAAATGGGTCATTCACATTATCTACGCTAATCATTACCCAAGAGCATATATGA  
TTAATCTTTCCAGCTTGACCCCTAGCCATGATATGATTCATTTCCACTCTAGCAGAGAC  
TAATCGAGCCCCCTTCGACTTA

*Canis aureus*\_ND1

TCCTAATAAACGGGTCATTTACACTATCCACACTAATTATCACCCAAGAACATATATGA  
CTAATCTTTCCGGCCTGGCCCCTAGCCATGATATGATTCATTTCTACTCTAGCAGAAAC  
TAACCGAGCCCCCTTCGACTTA

*Nyctereutes procyonoides*\_ND1

TACTGATAAACGGATCCTTCACATTATCCACACTCATTATCACCCAAGAACACATATGA  
TTAATTTTTCCAGCCTGACCATTAGCCATAATATGATTTATTTCCACACTAGCAGAAAC  
AAACCGAGCCCCCTTCGACCTA

*Vulpes vulpes*\_ND1

TGCTAATAAACGGATCATTACACTATCCACACTCATTATTACCCAAGAGCATATATGA  
CTAATTTTCCCTGCCTGACCTCTAGCCATGATATGATTTATCTCTACCCTAGCAGAAAC  
AAACCGGGCCCCCTTTGACTTA

*Felis silvestris*\_ND1

TACTAATAAACGGATCCTTCACACTAGCCATACTAATCACCACTCAAGAATATGTGTGA  
CTAATCATTCCCTGCATGACCCCTAGCCATAATATGATTTATCTCAACCCTAGCAGAGAC  
CAATCGAGCCCCATTCGACCTG

*Lynx lynx*\_ND1

TACTAATAAATGGATCCTTCACACTAGCCACACTAATCACCAACCAAGAATACATGTG  
ACTAATTATCCCTGCATGACCCCTAGCCATAATATGATTCATCTCAACACTAGCAGAAA  
CCAACCGAGCCCCATTCGACCTA

*Panthera tigris*\_ND1

TACTAATAAATGGATCCTTCACATTAGCTGCACTAATTACCACCCAAGAATACATCTGG  
CTCATCATCCCTGCATGACCCCTAGCCATAATATGATTCATCTCCACACTAGCAGAAAC  
CAACCGAGCTCCATTTGATCTA

*Martes foina*\_ND1

TATTAATAAATGGCTCTTTTACCCTATCCACACTTACTACTACACAAGAACACCTATGA  
CTAATCCTCCCCACATGACCCCTAGCTATAGTATGATTTATCTCAACCCTAGCAGAAAC  
CAACCGCACCCCATTTGACTTA

*Lutra lutra*\_ND1

TACTAATAAACGGCTCATTACCCCTATCCACATTAATCACCACACAGGAGCACCTATGA  
CTAATCCTACCCACATGACCCCTGGCTATAATATGATTTATTTCAACTCTGGCAGAAAC  
TAATCGCGCACCATTTGATCTA

*Sciurus vulgaris*\_ND1

TCCTTATAAACGGCTCATTACCCCTATCAACCCTTATCACAACCCAACAATTCATATGA  
CTAATTTTACCAACCTGACCCCTGGCTATAATATGATTTATTTCTACCCTAGCTGAAAC  
AAATCGAGCCCCATTTGACCTA

**Cytb reference sequences:**

*Felis silvestris*\_Cytb

CTAACATGAATCGGTGGCCAACCTGTAGAACATCCATTCATCACCATCGGCCAACTAG  
CCTCCATCCTATATTTCTCAACCCTCCTAATCCTAATACCCAT

*Lynx lynx*\_Cytb

CTAACATGAATTGGCGGCCAACCCGTAGAACACCCTTTCATCACCATCGGCCAACTGG  
CCTCCATCCTATACTTCTCAAC TCTCCTAGTCCTAATACCCAT

*Panthera tigris*\_Cytb

CTAACATGAATTGGTGGCCAACCTGTAGAACACCCTTTATTGCCATCGGCCAACTAGC  
CTCTATCCTATACTTCTTCATCCTCCTAGTCCTAATCCCCAT
