# Supplementary material for: Hindering the illegal trade in dog and cat furs through a DNA-based protocol for species identification
Source: PubMed Central journal article supplement (PMC5993017; doi:10.7717/peerj.4902), 2018-06-05
Supplement: peerj-06-4902-s002.pdf [file peerj-06-4902-s002.pdf]

Table S1. Accession numbers of the sequences used to design primers.

| <b>SPECIES</b>                                 | <b>COMPLETE<br/>mtDNA</b>                              | <b>ND1</b>                                                           | <b>CONTROL<br/>REGION</b>                                            | <b>CYTB</b>                                                                                                                              |
|------------------------------------------------|--------------------------------------------------------|----------------------------------------------------------------------|----------------------------------------------------------------------|------------------------------------------------------------------------------------------------------------------------------------------|
| <i>Canis lupus</i><br>dog/wolf                 | U96639<br>EU442884<br>FJ032363<br>AM711902<br>DQ480505 | U96639<br>EU442884<br>FJ032363<br>AM711902<br>DQ480505<br>AH014072   | U96639<br>EU442884<br>FJ032363<br>AM711902<br>DQ480505               | U96639<br>EU442884<br>FJ032363<br>AM711902<br>DQ480505                                                                                   |
| <i>Canis latrans</i><br>coyote                 | DQ480509<br>DQ480510<br>DQ480511<br>EU789789           | DQ480509<br>DQ480510<br>DQ480511<br>EU789789                         | DQ480509<br>DQ480510<br>DQ480511<br>EU789789                         | DQ480509<br>DQ480510<br>DQ480511<br>EU789789                                                                                             |
| <i>Canis aureus</i><br>jackal                  |                                                        | KT448272<br>KT448273<br>KT448274                                     | AY289996<br>AY289997<br>AF184048                                     |                                                                                                                                          |
| <i>Nyctereutes procyonoides</i><br>raccoon dog |                                                        | NC013700<br>GU256221<br>KF709435                                     | FJ888513<br>FJ888514<br>NC013700<br>GU256221                         |                                                                                                                                          |
| <i>Vulpes vulpes</i><br>red fox                |                                                        | JN711443<br>GQ374180<br>AM181037<br>KP342452                         | JN711443<br>GQ374180<br>AM181037                                     | JN711443<br>AM181037                                                                                                                     |
| <i>Procyon lotor</i><br>raccoon                |                                                        | AB297804<br>AB462045<br>AB462046<br>AB462049                         | AB297804<br>AB361247<br>AB462046<br>AB462047<br>AB462048<br>AB462049 |                                                                                                                                          |
| <i>Felis silvestris</i><br>domestic/wild cat   |                                                        | U20753                                                               |                                                                      | U20753<br>AB194812<br>AB004237<br>AB004238<br>AB194813<br>AB194814<br>AB194815<br>AB194816<br>AB194817<br>X82296<br>AY170102<br>EF689046 |
| <i>Lynx lynx</i><br>Eurasian lynx              |                                                        | KM982549                                                             |                                                                      | KM000081<br>KM000082<br>KF990332                                                                                                         |
| <i>Panthera tigris</i><br>tiger                |                                                        | EF551003<br>KF892541<br>KJ508412<br>KJ508413                         |                                                                      | AF053024<br>EF551003<br>KC495059<br>KC879293<br>KF892541<br>KJ508412<br>KJ508413                                                         |
| <i>Homo sapiens</i><br>human                   |                                                        | HM357817<br>KF384026<br>KJ154733<br>KC345898<br>JX900490<br>JN655842 | HM357817<br>KF384026<br>KJ154733<br>KC345898<br>JX900490<br>JN655842 | HM357817<br>KF384026<br>KJ154733<br>KC345898<br>JX900490<br>JN655842                                                                     |
